# Supplementary material for: Self-DNA Inhibition in Drosophila melanogaster Development: Metabolomic Evidence of the Molecular Determinants
Source: MDPI journal article supplement (doi:10.3390/biology12111378), 2023-10-27
Supplement: s1 [file s1]

# Self-DNA inhibition in *Drosophila melanogaster* development: metabolomic evidence of the molecular determinants

## SUPPLEMENTARY MATERIAL

**Figure S1.**  $^1\text{H}$  NMR spectra in triplicates of the *Drosophila* larvae apolar extracts registered in  $\text{CDCl}_3$  at 600 MHz.

**Figure S2.** Representative LC-MS chromatograms of polar extracts for each treatment (Sa and Sb) and control (Ca and Cb).

**Figure S3.** Molecular networking of all *D. melanogaster* polar extracts.

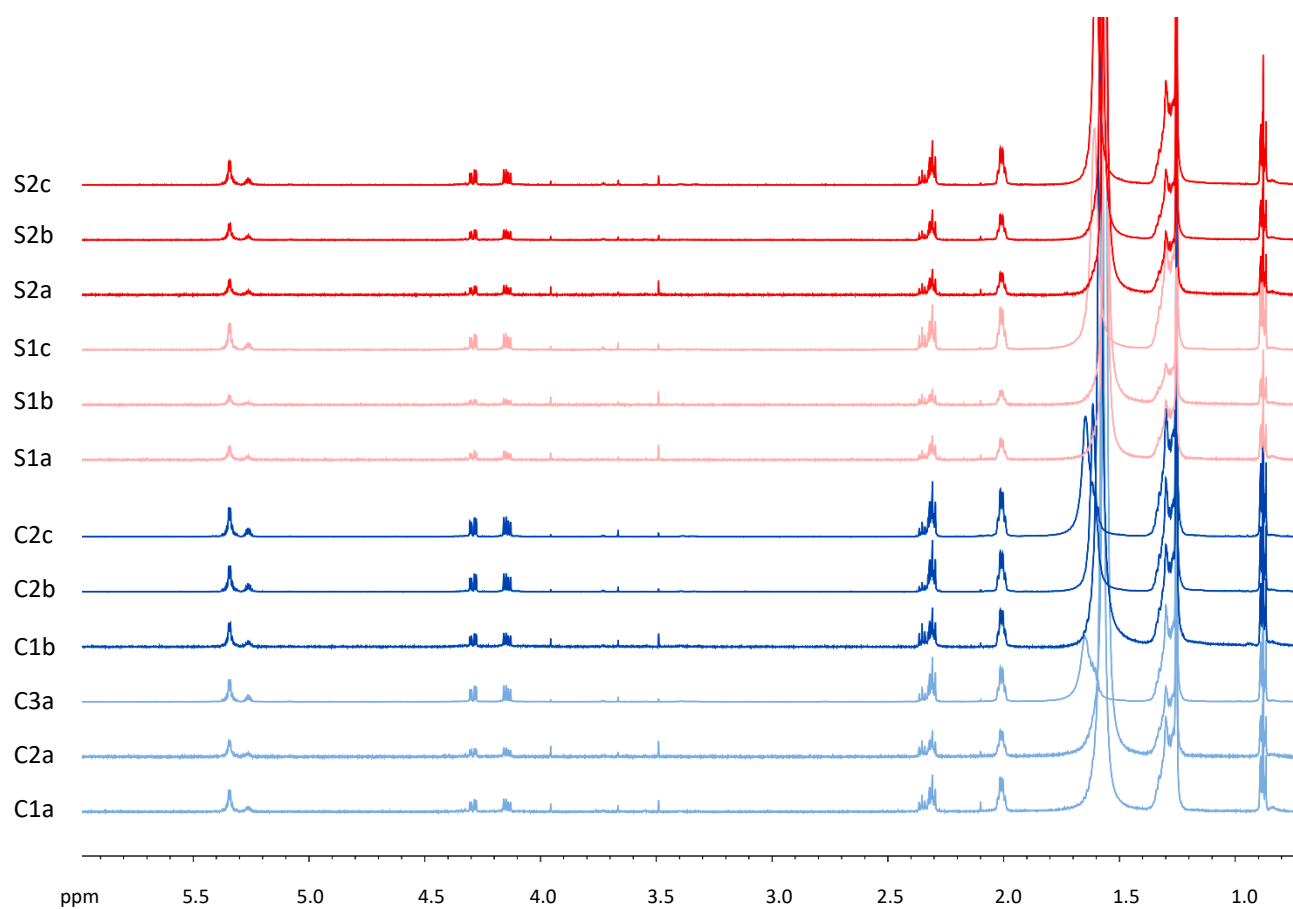

**Figure S1.** <sup>1</sup>H NMR spectra in triplicates of the *Drosophila* larvae apolar extracts registered in CDCl<sub>3</sub> at 600 MHz. In red self-DNA at longer exposition times (S1b, S2b and S3b); in light red self-DNA at exposition times (S1a, S2a and S3a). In blue control samples at longer exposition times (C1b, C2b and C3b); in light blue control samples at shorter exposition times (C1a, C2a and C3a).

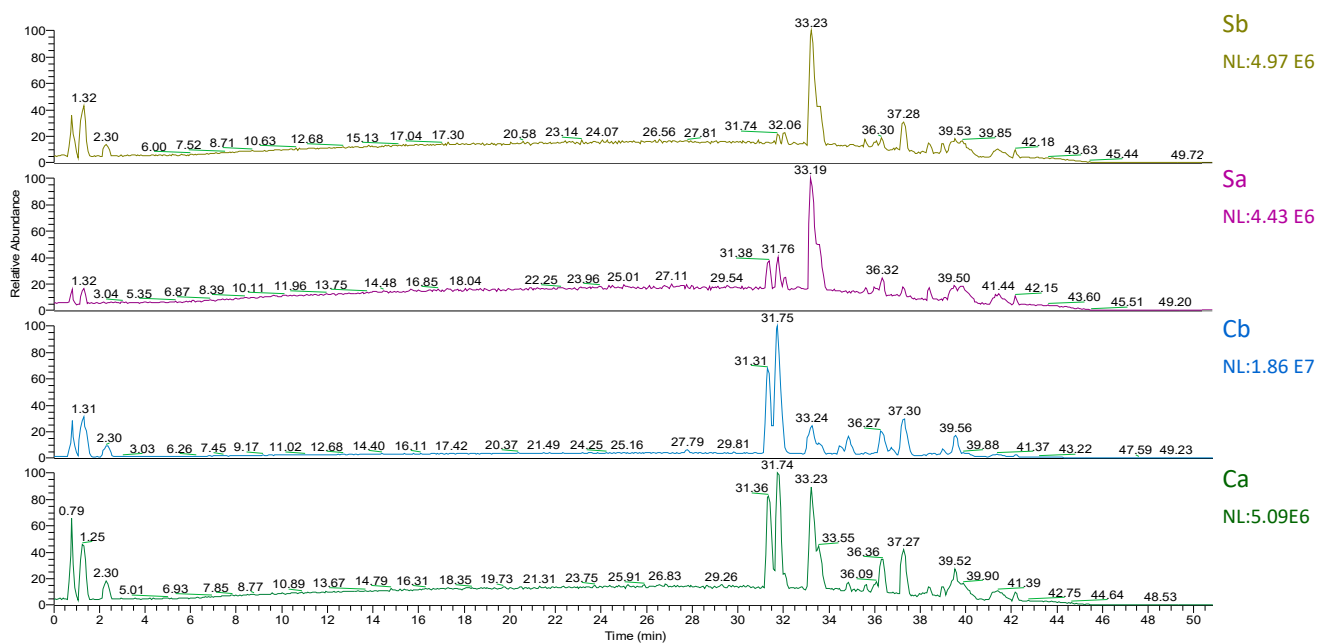

**Figure S2.** Representative LC-MS chromatograms of polar extracts for each treatment (Sa and Sb) and control (Ca and Cb).

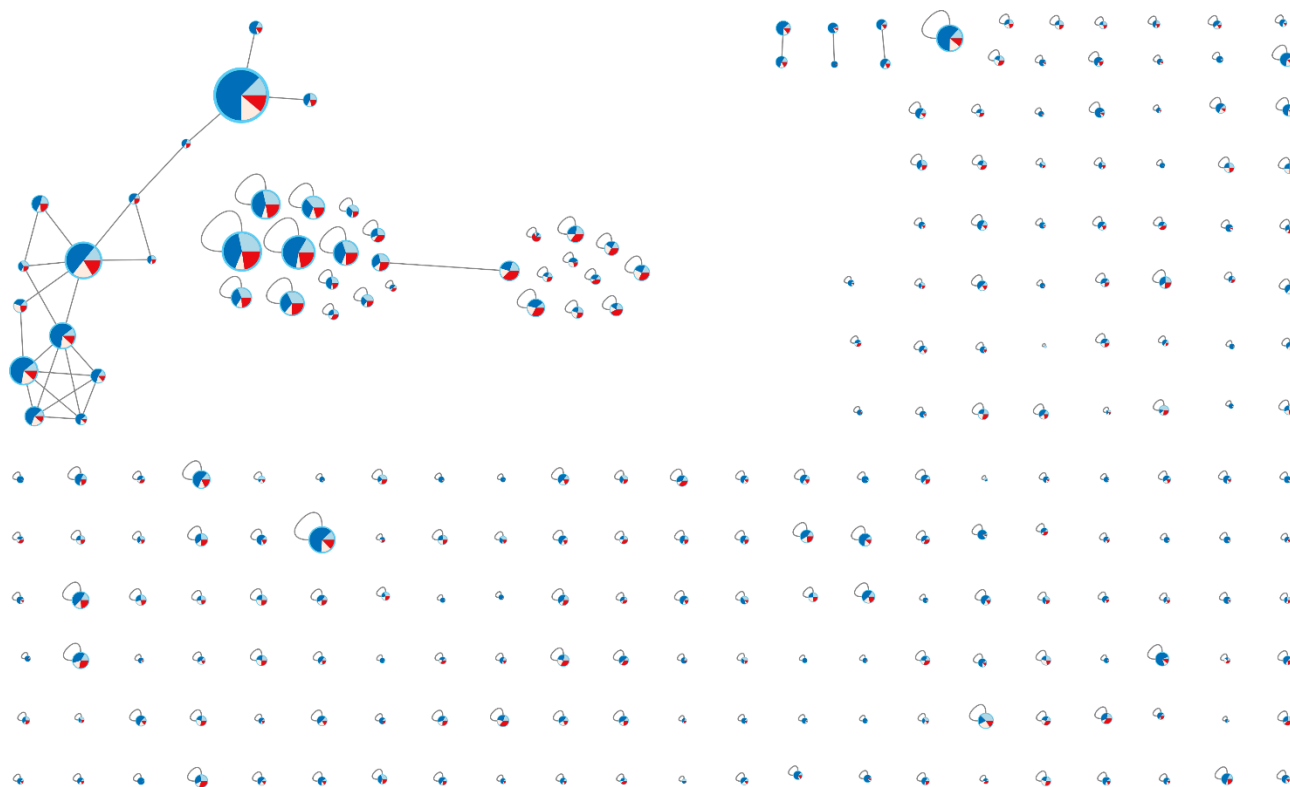

**Figure S3.** Molecular networking of all *D. melanogaster* polar extracts. Each node is represented as a color-coded pie-chart. Red slices refer to the sum of all samples exposed to self-DNA for 96h (S1b, S2b and S3b); light red slice to all samples exposed to self-DNA for 72h (S1a, S2a and S3a); blue slices to control samples at longer exposition times (C1b, C2b and C3b); light blue slices to control samples at shorter exposition times (C1a, C2a and C3a).
